# Supplementary material
Source: publisher site journal article supplement (https://static.cambridge.org/content/id/urn:cambridge.org:id:article:S2059866119004102/resource/name/S2059866119004102supp001.pdf)
Supplement: Supplementary file [file S2059866119004102supp001.pdf]

## Supplementary Data:

### Subject demographics

Twenty-one healthy volunteers were recruited for this study and their demographics are shown in Supplementary Table. More female subjects took part in this study (71%) than male ( $p = 0.0784$ ), with majority of volunteers being Caucasian (90%;  $p = 0.002$ ). The distribution of age groups is relatively uniform with fewer volunteers  $\leq 20$  years of age.

Table. Subject Demographics

|           | <b>Summary</b>                     | <b>N(%)</b> |
|-----------|------------------------------------|-------------|
| Sex       | Female                             | 15(71)      |
|           | Male                               | 6 (29)      |
| Ethnicity | Hispanic / Latino                  | 0 (0)       |
|           | White                              | 19 (90)     |
|           | Black or African American          | 0 (0)       |
|           | Asian                              | 2 (10)      |
|           | Native American / Alaska Native    | 0 (0)       |
|           | Native Hawaiian / Pacific Islander | 0 (0)       |
| Age       | <20                                | 2 (10)      |
|           | 21-45                              | 7 (33)      |
|           | 46-60                              | 7 (33)      |
|           | 61-75                              | 5 (24)      |
| Total     |                                    | 21(100)     |
